# Supplementary material
Source: PubMed Central journal article supplement (PMC5210749)
Supplement: supp_pp.16.01504_PP2016-01504DR1_Supplemental_Material.pdf [file supp_pp.16.01504_PP2016-01504DR1_Supplemental_Material.pdf]

## Supporting Online Material for

### TATA box insertion provides a selected mechanism in apple for enhancing gene expression to adapt to Fe deficiency

Meiling Zhang<sup>1†</sup>, Yuanda Lv<sup>1†</sup>, Yi Wang<sup>1†</sup>, Jocelyn K. C. Rose<sup>2</sup>, Fei Shen<sup>1</sup>,  
Zhenyun Han<sup>1</sup>, Xinzhong Zhang<sup>1</sup>, Xuefeng Xu<sup>1</sup>, Ting Wu<sup>1\*</sup>, Zhenhai Han<sup>1\*</sup>

<sup>1</sup>Institute for Horticultural Plants, China Agricultural University, Beijing 100193, P. R. China

<sup>2</sup>Department of Plant Biology, Cornell University, Ithaca, New York 14853, USA

<sup>†</sup>These authors contributed equally to this work.

<sup>\*</sup>To whom correspondence should be addressed.

Ting Wu, Email: [wuting@cau.edu.cn](mailto:wuting@cau.edu.cn)

Zhenhai Han, Email: [rschan@cau.edu.cn](mailto:rschan@cau.edu.cn)

#### This file includes:

**Supplemental Figure S1.** Sequences of the 1500 bp FUE and FUI promoters.

**Supplemental Figure S2.** Correlation analysis between chlorosis ratios and relative expression levels of *IRT1* in the progeny of *M. xiaojinensis* and *M. baccata* under Fe-deficiency treatment.

**Supplemental Figure S3.** Transient *GUS* expression under the control of the FUE and FUI promoters in wild type tobacco.

**Supplemental Figure S4.** Complementation test of *IRT1* Fe<sup>2+</sup> uptake in the *fet3fet4* yeast mutant grown on Fe-deficient medium supplemented with 55 μM BPDS (bathophenanthrolinedisulfonic acid disodium salt), pH 5.8.

**Supplemental Figure S5.** Phylogenetic analysis of homologous transcription factors in the apple and *A. thaliana* genomes.

**Supplemental Table S1.** Primers for the transcription factor genes used in the yeast one-hybrid assay.

**Supplemental Table S2.** Probe sequences used for EMSA.

**Supplemental Data 1.** Sequences of *IRT1* promoters with different numbers of the

TATA-box insertion.

**Supplemental Method S1.** *A. thaliana* protoplast isolation and PEG-mediated gene transformation.

**Supplemental Method S2.** Modified yeast one-hybrid analysis protocol.

**Supplemental Method S3.** Functional complementation in yeast.

|     |                                                                                                         |       |
|-----|---------------------------------------------------------------------------------------------------------|-------|
| FUE | GATTCCTCGCCAACTCTCCACCCCTTTAATGTAGATAAATATCGTTTCTTCAAAAAAAAAAAGGACTTTCCTCAATTGAGACTCTCAAAAGTACGATTTTT   | -1436 |
| FUI | GATTCCTCGCCAACTCTCCACCCCTTTAATGTAGATAAATATCGTTTCTTCAAAAAAAAAAAGGACTTTCCTCAATTGAGACTCTCAAAAGTACGATTTTT   | -1426 |
| FUE | ATGAACTCTTACCACCTCATATTTTAGCACAATGTTTTAAATATTGGCAGGAGAATTAACGTTTACTGTTAGGTGATTGAGAATCCATAAAAAGTTT       | -1336 |
| FUI | ATGAACTCTTACCACCTCATATTTTAGCACAATGTTTTAAATATTGGCAGGAGAATTAACGTTTACTGTTAGGTGATTGAGAATCCATAAAAAGTTT       | -1326 |
| FUE | CACITTAAGAGAGTCTCTTAATTTTTCTTTAAGAATAATGTTAGGAAGGCCAAGTTTCTAAATTAATTTTTATAAACAAAATAATGTAAGCCAAGTTTCT    | -1236 |
| FUI | CACITTAAGAGAGTCTCTTAATTTTTCTTTAAGAATAATGTTAGGAAGGCCAAGTTTCTAAATTAATTTTTATAAACAAAATAATGTAAGCCAAGTTTCT    | -1226 |
| FUE | AAATTAATTTTTATAAACAAAATAATGTAAGCCAAGTTTCTAAATTAATTAATCACTCATCGTTTAGGTATCGATACCCTCCTATATGCATTCTGCCATTCTT | -1136 |
| FUI | AAATTAATTTTTATAAACAAAATAATGTAAGCCAAGTTTCTAAATTAATTAATCACTCATCGTTTAGGTATCGATACCCTCCTATATGCATTCTGCCATTCTT | -1126 |
| FUE | AATTTTTTTTCCACAGTTGACATGTTCCGAAAGAATTTATATGGGACATCAACTAAGAGTGACAATTCATTTCATCTTATATATCTTTTAAATGAATTCGA   | -1036 |
| FUI | AATTTTTTTTCCACAGTTGACATGTTCCGAAAGAATTTATATGGGACATCAACTAAGAGTGACAATTCATTTCATCTTATATATCTTTTAAATGAATTCGA   | -1026 |
| FUE | AATCCCACTTTGCTTAGAAGTGAAAGGTTTTAAATTCGAATATCGTGGATGACGAATTCGATACCAAAATAGACTGCTTATTGTGTGACTTAGCCGAAT     | -936  |
| FUI | AATCCCACTTTGCTTAGAAGTGAAAGGTTTTAAATTCGAATATCGTGGATGACGAATTCGATACCAAAATAGACTGCTTATTGTGTGACTTAGCCGAAT     | -926  |
| FUE | TCCCTTCTCATAGTGTAAAAATATCGATGTTGTAAAAAACAATAATTTGAAGTCCAATGTATTCTTTAATTTACATTAATTTTCATGAAGATCAG         | -836  |
| FUI | TCCCTTCTCATAGTGTAAAAATATCGATGTTGTAAAAAACAATAATTTGAAGTCCAATGTATTCTTTAATTTACATTAATTTTCATGAAGATCAG         | -826  |
| FUE | AAGCTTAATCAAAATAATGCTAATTCCTCAAAAGTATATGTCAAAATAATTTTCATAAAAAAGCTGATATGAGCTGCTTCTTTTTCATCAGAAACATTGA    | -736  |
| FUI | AAGCTTAATCAAAATAATGCTAATTCCTCAAAAGTATATGTCAAAATAATTTTCATAAAAAAGCTGATATGAGCTGCTTCTTTTTCATCAGAAACATTGA    | -726  |
| FUE | ATTTATAGCATGGAACAAAATTAAGAGCAACCAAAATTCGAAAGCCCATCAGGGAAAGAAATGGTGCCTAATTACAAACAGGGAGATATAGATCCCAGACA   | -636  |
| FUI | ATTTATAGCATGGAACAAAATTAAGAGCAACCAAAATTCGAAAGCCCATCAGGGAAAGAAATGGTGCCTAATTACAAACAGGGAGATATAGATCCCAGACA   | -626  |
| FUE | ATAAAAAGGCATTACGCCAAAAGGCTAGATTTACAGAAAGCTGAGGAAGGCAGTACGCAGCTGCCAACCTCAATCCGAAGCCACCGGAGGACATGGCAAA    | -536  |
| FUI | ATAAAAAGGCATTACGCCAAAAGGCTAGATTTACAGAAAGCTGAGGAAGGCAGTACGCAGCTGCCAACCTCAATCCGAAGCCACCGGAGGACATGGCAAA    | -526  |
| FUE | GCCGTCACGTGAAAGAACACCACCAAAAGGGATGGGACATGGAAGCCCAACAAAGATCATAGCACACACTATGCTTGTAAATGGTTGACCTGCCAAAAT     | -436  |
| FUI | GCCGTCACGTGAAAGAACACCACCAAAAGGGATGGGACATGGAAGCCCAACAAAGATCATAGCACACACTATGCTTGTAAATGGTTGACCTGCCAAAAT     | -426  |
| FUE | ATTAACCTGAAATATCTTCATCTGGACGGACAACGGAGTTTTACCAATTTGACATATTTGATATATATAAAATATAATGTTGAAAATAACCAGCTTCTCT    | -336  |
| FUI | ATTAACCTGAAATATCTTCATCTGGACGGACAACGGAGTTTTACCAATTTGACATATTTGATATATATAAAATATAATGTTGAAAATAACCAGCTTCTCT    | -326  |
| FUE | TACTTTCATGCATGGTTGCATATATAAATATATCAATGAAGAATAAAACATTTCCGTACTGCAATTCATCAATACAAACGACTTCTATTTTTAAAGCCT     | -236  |
| FUI | TACTTTCATGCATGGTTGCATATATAAATATATCAATGAAGAATAAAACATTTCCGTACTGCAATTCATCAATACAAACGACTTCTATTTTTAAAGCCT     | -236  |
| FUE | TTTACAAGTCCGACGAAAAAATATTTGGACAAATCAACAGTACATAAAATAGGTACAATATAAAATAGAGTTTGTATTTTTTTGGCCAAATAGGTAT       | -136  |
| FUI | TTTACAAGTCCGACGAAAAAATATTTGGACAAATCAACAGTACATAAAATAGGTACAATATAAAATAGAGTTTGTATTTTTTTGGCCAAATAGGTAT       | -136  |
| FUE | AACATTGAACTTATCACCCTAATATTTTTATGTTATTGATTGCTAATAAATCTCAGAGACCTCTCTATATAAACAAAGCTCTAATACACTCAAACCCAATA   | -36   |
| FUI | AACATTGAACTTATCACCCTAATATTTTTATGTTATTGATTGCTAATAAATCTCAGAGACCTCTCTATATAAACAAAGCTCTAATACACTCAAACCCAATA   | -36   |
| FUE | GTACCAATAATAGCTTAGCTAAAAATCAGGGTCA                                                                      | -1    |
| FUI | GTACCAATAATAGCTTAGCTAAAAATCAGGGTCA                                                                      | -1    |

**Supplemental Figure S1.** Sequences of the 1500 bp FUE and FUI promoters.

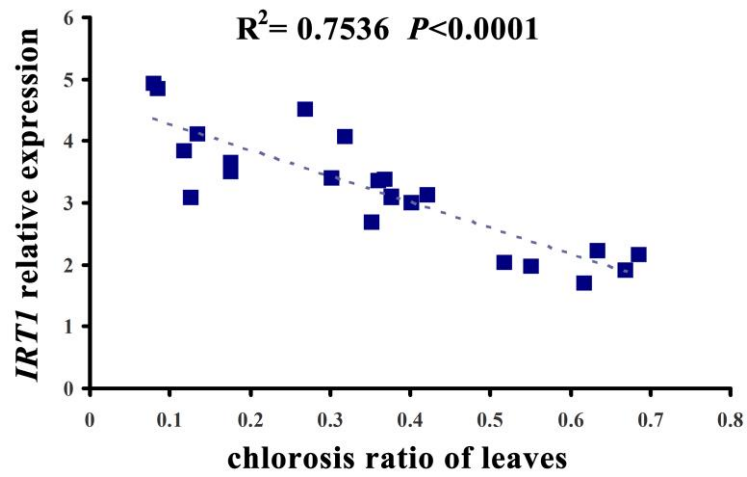

**Supplemental Figure S2.** Correlation analysis between chlorosis ratios and relative expression levels of *IRT1* in the progeny of *M. xiaojinensis* and *M. baccata* under Fe-deficiency treatment.

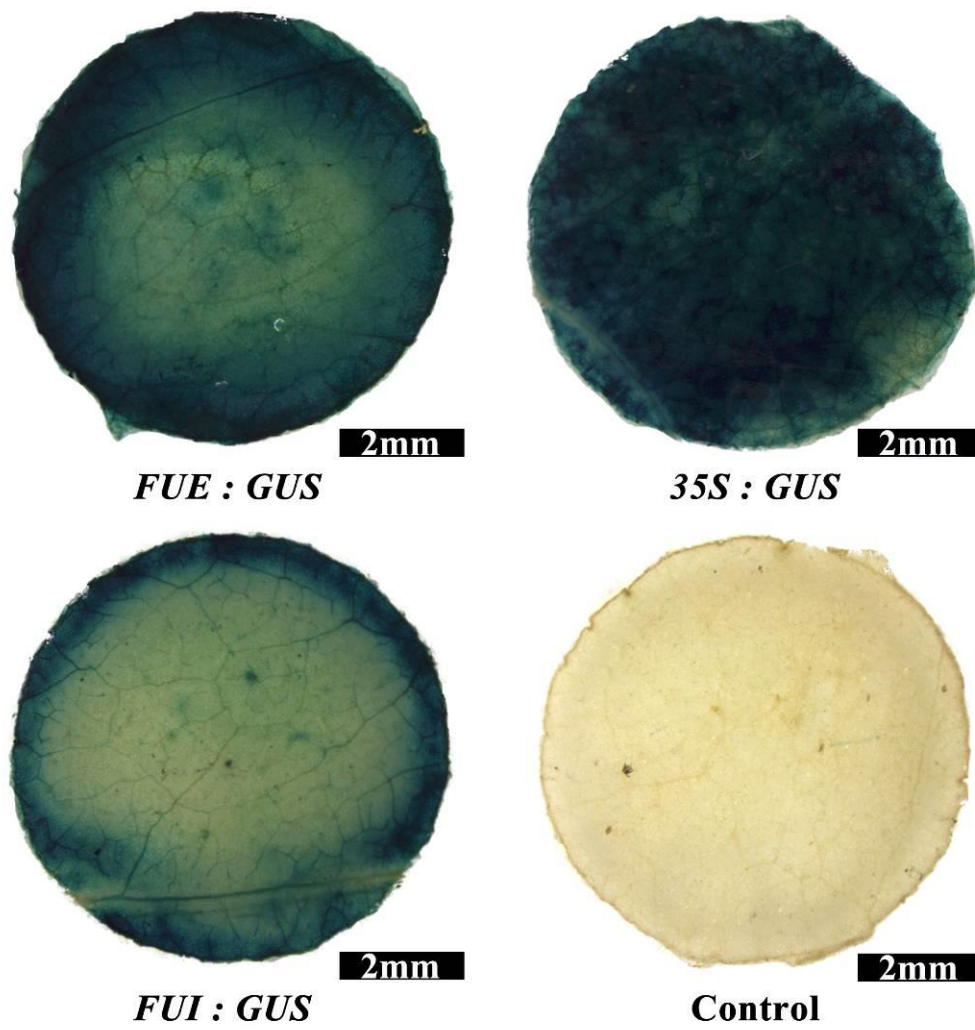

**Supplemental Figure S3.** Transient *GUS* expression under the control of the FUE and FUI promoters in wild type tobacco.

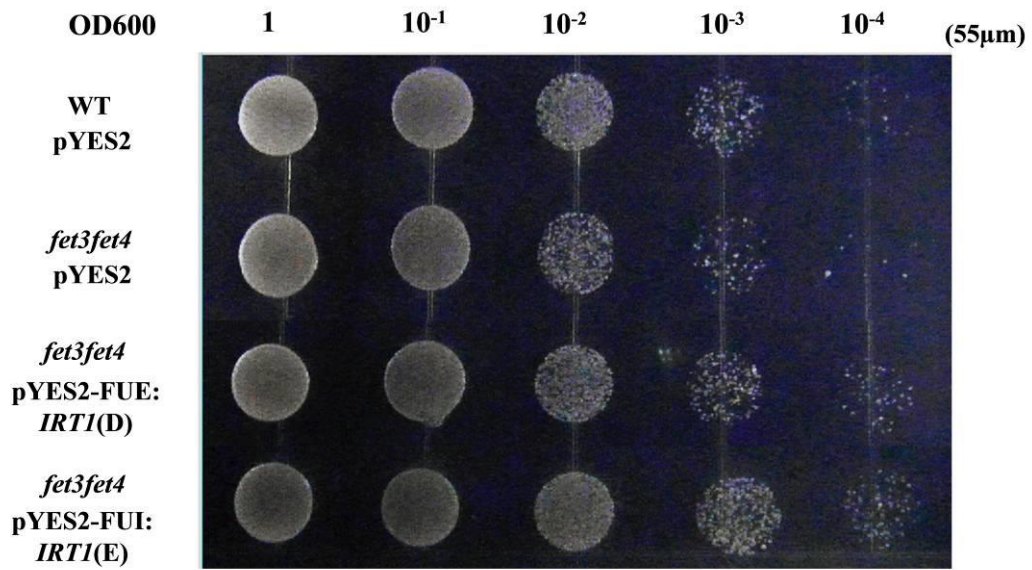

**Supplemental Figure S4.** Complementation test of *IRT1* Fe<sup>2+</sup> uptake in the *fet3fet4* yeast mutant grown on Fe-deficient medium supplemented with 55 μM BPDS (bathophenanthrolinedisulfonic acid disodium salt), pH 5.8.

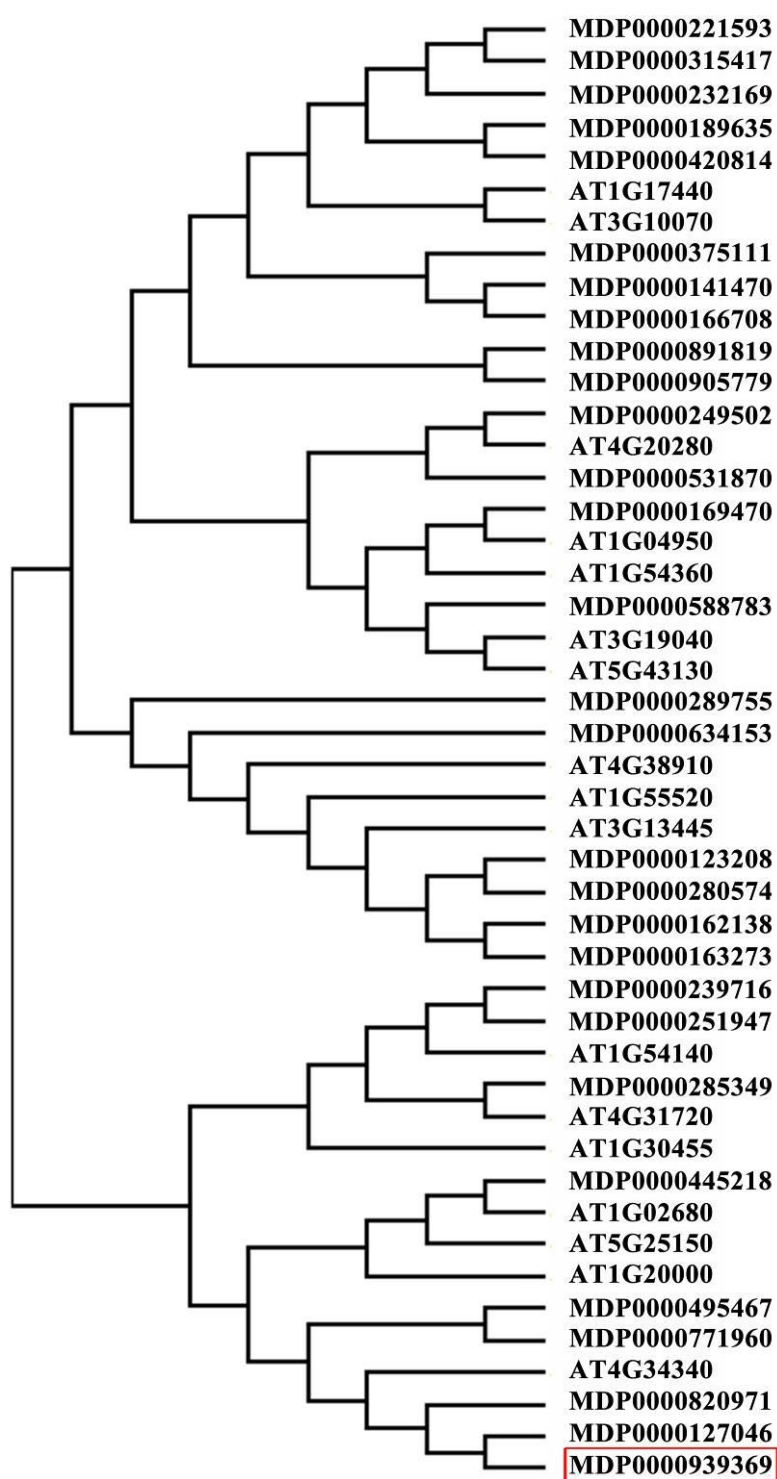

**Supplemental Figure S5.** Phylogenetic analysis of homologous transcription factors in the apple and *A. thaliana* genomes.

**Supplemental Table S1.** Primers for the transcription factor genes used in the yeast one-hybrid assay.

| Gene          |     | Primer sequences(5'-3')   |
|---------------|-----|---------------------------|
| MDP0000249502 | Fwd | ATGAAGCAGCAATCCAAGGACCC   |
|               | Rev | CTACCGGAAGAGCCTAGACTGTGAT |
| MDP0000251947 | Fwd | ATGGCAGGGGAAGATGAGGACTT   |
|               | Rev | CTACCTTGCGACATGCTTGG      |
| MDP0000239716 | Fwd | ATGGTTCATGCAGAATCGGC      |
|               | Rev | TCATCCTCCACCATTTCTTCCGTTA |
| MDP0000163273 | Fwd | ATGGAGGCGCAAGGTTTCAA      |
|               | Rev | TTAAAGTTCATACCAATGCTGATTT |
| MDP0000162138 | Fwd | ATGTTTGGGTCACGACGCGT      |
|               | Rev | TTAAAGTTCATACCAATGCTGATTT |
| MDP0000280574 | Fwd | ATGGAAGAACAAGGTGGATCTGAAG |
|               | Rev | TTACTGTTGCTGGACCTTCTGAAC  |
| MDP0000634153 | Fwd | ATGACGTCAATCGGGCCGGT      |
|               | Rev | TYAAYYYTKMYCYGKYGCATCWTCT |
| MDP0000123208 | Fwd | CGTTTTGCCGCGGTCATTAT      |
|               | Rev | TCATCCTTGAATGTCCTTGTGTCAC |
| MDP0000445218 | Fwd | ATGGAAGACATCGTTGTGGAATATG |
|               | Rev | TCAAAGCCCTTCCTCAGCTT      |
| MDP0000169470 | Fwd | ATGAGCATTGTGCCCAAAGA      |
|               | Rev | TTACAAAAACAAACACATCTCGG   |
| MDP0000166708 | Fwd | ATGGCGGAAAACGGCCCATC      |
|               | Rev | TTAAAACCGAGTCATTTGCTGCATC |
| MDP0000141470 | Fwd | ATGGCGGAAAACGGCCCATC      |
|               | Rev | TTAAAACCGAGTCATTTGCTGCAGC |
| MDP0000315417 | Fwd | ATGGGCCGTGGCGGCGTCTC      |
|               | Rev | TTATGTAACTTCACGCATTTTAGAG |
| MDP0000221593 | Fwd | ATGGATCAACAGAACTCCACC     |
|               | Rev | TTATGTAACTTCACGCATTTTAGAG |
| MDP0000232169 | Fwd | ATGGATCAACAGAACTCCACCA    |
|               | Rev | CACAGCAAGACGCTCCTTGT      |
| MDP0000375111 | Fwd | ATGGGGGTGATGGGATCCAT      |
|               | Rev | TTAGATCTTCAATTGATCGTCATTA |
| MDP0000891819 | Fwd | ATGATTGAYTTTTTATTATCCC    |
|               | Rev | TTATGTAACTTCACGCATTTTAGAG |
| MDP0000905779 | Fwd | ATGATTGACTTTTATTATCCCCAA  |
|               | Rev | TTAACAAGACCACCCTTTGCATTT  |
| MDP0000531870 | Fwd | ATGTCGGCTTTCTGGCTGTG      |
|               | Rev | TTAAAGCCCCACCTCAACATTTT   |
| MDP0000588783 | Fwd | ATGGCATCTTCTTCGGACTCAT    |
|               | Rev | TCMCCTTTTGCAAATTGAAGAAA   |

---

|               |     |                            |
|---------------|-----|----------------------------|
| MDP0000430814 | Fwd | ATGCAGGGAATGGGGATGAT       |
|               | Rev | TCAATTACTCACAGAATCAACAAAT  |
| MDP0000189635 | Fwd | ATGGACCAACAGAACTCCAC       |
|               | Rev | TCAATTACTCACAGAATCAACAAAT  |
| MDP0000285349 | Fwd | AATCAGGCTGGTAGCTGTCTG      |
|               | Rev | TTACTCTTCCCTTGTTGCAGGAT    |
| MDP0000939369 | Fwd | ATGAGCCATGGAGATGCGGA       |
|               | Rev | CTACAACCTGAGTGAGTTCCTGTGGG |
| MDP0000127046 | Fwd | ATGAGCCATGGAGATGCGGA       |
|               | Rev | CTACAACCTGAGTGAGTTCCTGTGGG |
| MDP0000820971 | Fwd | ATGAGCCATGGAGATGCGGA       |
|               | Rev | CTACAACCTGAGTGAGTTCCTGTGGG |
| MDP0000495467 | Fwd | ATGACCAATGGGGKTTGGGGA      |
|               | Rev | TTACAACCTCCGCAAGCTCCTCTTG  |
| MDP0000771960 | Fwd | ATGACCGATGGGGGTGTGGA       |
|               | Rev | TTATAACTCAGCAAGCTCCTCTGGG  |
| MDP0000289755 | Fwd | ATGGGGGATCAAAGTGGATTAGAAG  |
|               | Rev | TCAAGCATGCTTGGGAAGTACTGGA  |

---

The primers in red were expressed in roots of *M. xiaojinensis* and selected for amplify the candidated transcription factors of yeast one-hybrid.



**Supplemental Table S2.** Probe sequences used for EMSA.

---

| <b>Probes</b> |                                                                  |
|---------------|------------------------------------------------------------------|
| FUE           | TACCAATTGTACATATTGTTGATATATATAAATTATAATGTT<br>GAAAATAACCAGCTTCCT |
| FUI           | TACCAATTGTACATATTGATATATATAATGTTGAAAATAACC<br>AGCTTCCT           |

---

TATA-box insertion in probes are shown in red.

**Supplemental Data 1. Sequences of *IRT1* promoters with different numbers of the TATA-box insertion.**

1 AAGCCACCGG AGGACATGGC AAAGCCGTCA CGTGAAAGAA CACCACCAA GAGGGATGGG  
61 ACATGGAAGC CCAACAAAGA TCATAGCACA CACTATGCTT GTAATTGGTT GACCTGCCAA

P0 121 AATATTA ACT GAAATAT CTTCA TCTG GACGGACAAC GGAGTTTTAC  
P1 121 AATATTA ACT GAAATAT CTTCA TCTG GACGGACAAC GGAGTTTTAC  
P2 121 AATATTA ACT GAAATAT CTTCAA TTATAA TCTG GACGGACAAC GGAGTTTTAC  
P3 121 AATATTA ACT GAAATAT ATTATAA CTTCAA TTATAA TCTG GACGGACAAC GGAGTTTTAC

P0 181 CAATTGTACA TATTGTTGAT ATATATAA TGTTG AAAATAACCA GCTTCCTTAC  
P1 181 CAATTGTACA TATTGTTGAT ATATATAA AT TATAA TGTTG AAAATAACCA GCTTCCTTAC  
P2 181 CAATTGTACA TATTGTTGAT ATATATAA AT TATAA TGTTG AAAATAACCA GCTTCCTTAC  
P3 181 CAATTGTACA TATTGTTGAT ATATATAA AT TATAA TGTTG AAAATAACCA GCTTCCTTAC

241 TTTCATGCAT GGTTGCATAT ATAAATATAT CAATGAAGAA TAAAACATTT CCGTACTGCA  
301 ATTCATCAAT ACAAACGACT TCTATTTTTT AAAGCCTTTT ACAAGTCCGC AGCAAAAAAA  
361 ATATTGGACA AATCAACAAG TATATAAAAT AGGTACAATA TAAAATAGAG TTTGTTATTT  
421 TTTTGGCCAA TAGGTATAAC ATTGAACTTA TCACCCTAAT ATTTTATGTT ATTGATTGCA  
481 TAATAAATCT CAGAGACCTC TCTATATAAA CAAGCTCTAA TACTACTCAA CCCAATAGTA  
541 CCAATAATAA CTTGAGCTAA AAATCAGGGT CA

**Supplemental Method S1.** *A. thaliana* protoplast isolation and PEG-mediated gene transformation.

Protoplasts were isolated using a modified version of a protocol developed for *Arabidopsis*. Grow *Arabidopsis* plant on nutrient soil in an environment-controlled chamber for 20–30 days. Choose well-expanded and healthy leaves, then cut the leaves from 0.5 mm to 1 mm with fresh sharp razor blade. We transfer leaf strips into the prepared enzyme solution [1.5% (wt/vol) cellulase R10, 0.4% (wt/vol) macerozyme R10, 0.4M mannitol, 20 mM MES (pH5.7), 20mM KCl. Warm the solution at 55 °C for 10 min and cool it to room temperature, then add 10mM CaCl<sub>2</sub>, and 0.1% BSA]. Subsequently, Enzymatic hydrolysis reaction for 3.5 h with gentle shaking at 40 rpm and room temperature, in the dark. Check for the release of protoplasts in the solution under the microscope and dilute the enzyme solution with W5 solution [2mM MES (pH5.7), 154mM NaCl, 125mM CaCl<sub>2</sub>, 5 mM KCl], then filtered through a 100-mesh stainless steel filter into 50 ml round-bottomed tube. Centrifuge the flow-through for 5 min at 700 rpm. Remove the supernatant and re-suspend the protoplast with W5 solution. Keep the protoplasts on ice for 30 min and remove the W5 solution. Then re-suspend the protoplast with MMG solution [4 mM MES (pH5.7), 0.4 M mannitol, 15mM MgCl<sub>2</sub>]. We can use a hemocytometer to measure protoplast density.

We used a DNA-PEG–calcium transfection method for protoplast [40% (wt/vol) PEG4000 in ddH<sub>2</sub>O was prepared with 0.2 M mannitol and 100 mM CaCl<sub>2</sub>]. Add 10 ml target gene plasmid DNA (10–20 ug) and 10 ml reference gene plasmid DNA (10–20ug) to a 5-ml microfuge tube. Add 200ul protoplasts and well-mixed gently. Then add 220ul of a 40% PEG 4,000 solution quickly and well-mixed gently. Incubate the transfection mixture at room temperature for 15 min and stop the transfection with the addition of 2 ml W5 solution, mix well by gently rocking. Centrifuge at 700 rpm for 5 min at room temperature and remove the W5 solution. Add 1ml WI solution [4 mM MES (pH5.7), 0.5 M mannitol, 20 mM KCl] to incubate protoplasts at room temperature (23-25 °C). After 16h, we analyzed for GFP expression. Harvest protoplasts by centrifuging at 700 rpm for 5 min and store at -80 °C for RNA extraction.

**Supplemental Method S2.** Modified yeast one-hybrid analysis protocol.

Integrating recombinant vectors into the yeast genome.

1. Yeast EGY48 streaked on the YPD plate, 28 °C, 2-3d;
2. Select single colony into 25ml YPDA liquid medium, incubate at 28 °C for overnight with shaking at 200 rpm;
3. Centrifuge the culture at 3000rpm for 5min at room temperature;
4. Discard the supernatant and resuspend each cell pellet in 25 ml of sterile water;
5. Centrifuge the culture at 3000rpm for 5min at room temperature;
6. Discard the supernatant and resuspend each cell pellet in 25 ml of sterile water;
7. Equal to the 1.5ml centrifuge tubes;
8. Centrifuge at 3000rpm for 5mins at room temperature;
9. Resuspend each cell pellet in 100µl one-step-buffer (36µl 1M 10×LiAc, 240µl 50% PEG3350, 26µl salmon DNA, sufficient mixing);
10. Add 6µl salmon DNA, 2µl recombinant AD vector, 2µl recombinant BD vector;
11. Incubate at 45 °C for 30min, sufficient mixing every 10min;
12. Coated at corresponding plates, 28 °C, 2-3d.

#### Chromogenic reaction

1. Select 5-10 single colonies into 3ml corresponding liquid medium, incubate at 28 °C for overnight with shaking at 200 rpm;
2. Get the 5µl bacterial liquid at the corresponding plates with x-gal;
3. 28 °C, 2-3d, observe the color change.

### **Supplemental Method S3.** Functional complementation in yeast.

The yeast strains used in the experiment included wild type (WT) strain DEY1457 and the yeast mutant *fet3fet4* DEY1453 (Eide et al., 1996; Dix et al., 1997), which were generously supplied by Dr. Yuanmei Zuo from China Agricultural University (Shen et al., 2014). The WT yeast cells transformed with pYES DEST52 were used as positive controls. The IRT1(+/-TATA box) cDNA was inserted into the yeast expression vector pYES DEST52 by using GATEWAY method (Invitrogen Biotechnology Co., Ltd., Beijing, China).

pYESDEST52-IRT1(+/-TATA box) were transformed into *fet3fet4* yeast mutant, respectively, for yeast functional complementation assays of IRT1. The transformed yeast cells were prepared according to a high-efficiency transformation protocol (Gietz & Woods, 2002) and selected on solid synthetic defined (SD)-Ura media plates. Yeast cells were grown on 1 % yeast extract, 2 % peptone, 40 mg l<sup>-1</sup> adenine, 2 %

dextrose medium plates (pH 5.8) before transformation and on SD-Ura plates (pH 5.8) after transformation at 28 °C for 3 days. For iron starvation media, bathophenanthroline disulphonic acid disodium salt (BPDS) was added. The transformed cells were grown overnight and diluted to OD 1-10<sup>-4</sup> at 600 nm. The diluted cells (10 µl) were spotted onto the tested medium and cultured at 28 °C. Photographs of the yeast colonies were taken after 3 days growth. Three independent tests were performed.

#### **LITERATURE CITED**

**Dix D** (1997) Characterization of the FET4 protein of yeast. *J Biol Chem* **272**: 11770-11777

**Eide D, Broderius M, Fett J, Guerinot ML** (1996) A novel iron-regulated metal transporter from plants identified by functional expression in yeast. *Proc Natl Acad Sci USA* **93**: 5624-5628

**Gietz RD, Woods RA** (2002) Transformation of yeast by lithium acetate/single-stranded carrier DNA/polyethylene glycol method. *Method Enzymol* **350**: 87

**Shen H, Xiong H, Guo X, Wang P, Duan P, Zhang L, Zhang F, Zuo Y** (2014) AhDMT1, a Fe<sup>2+</sup> transporter, is involved in improving iron nutrition and N<sub>2</sub> fixation in nodules of peanut intercropped with maize in calcareous soils. *Planta* **239**: 1065-1077
